# Supplementary material for: Targeting CD38 Suppresses Induction and Function of T Regulatory Cells to Mitigate Immunosuppression in Multiple Myeloma
Source: Oxford University Press journal article supplement (doi:10.1158/1078-0432.ccr-16-3192), 2017-03-02
Supplement: 10780432ccr163192-sup-176158_1_supp_3836502_rkccrx.docx [file 10780432ccr163192-sup-176158_1_supp_3836502_rkccrx.docx]

**Targeting CD38 suppresses induction and function of T regulatory cells to mitigate immunosuppression in multiple myeloma**

Xiaoyan Feng,1,2 Li Zhang,1 Chirag Acharya,1 Gang An,1 Kenneth Wen,1 Lugui Qiu,2 Nikhil Munshi,1 Yu-Tzu Tai,1 Kenneth C Anderson1

**Materials and methods**

**Cell Culture** Human multiple myeloma cell lines, recently authenticated by STR profiling, were cultured in mycoplasma free condition and maintained in complete culture medium (RPMI 1640 medium supplemented by 10% FBS, 2 mM L-Glutamine, 100 IU/ml penicillin, 100 mg/ml streptomycin) in ventilated tissue culture flasks at 37°C in a 5% CO2 humidified incubator. CD38 is hardly detected in JJN3 and U266 cells.1

**Migration assay and Real-time PCR**

Fresh PBMCs were starved for 1 hr and then incubated for 1 h with different concentrations of Isa. Then 2x106 PBMCs were seeded in 50μl serum free medium in the top, and conditioned media from RPMI8226 or serum free medium were plated into the bottom, of 8 mm pore migration chambers (Corning). Following 4 h incubation at 37°C, cells migrating to the lower chambers were collected and used for Tregs cell analysis, representing as both proportion and absolute numbers.

Real time qRT-PCR was performed using specific primers Hs00998133_m1 and Hs00961622_m1 (Applied Biosystem) for TGFβ and IL10, respectively. GAPDH or 18S were used as internal controls for normalization.

**Cytokine production measurement**

The concentration of IL10 and TGFβ in cell culture supernatants was measured using commercial ELISA kit (R&D systems), according to the manufacturer’s instruction. In brief, cell culture supernatants and standards were added into the wells pre-coated with monoclonal antibody specific to human IL10 or TGFβ, followed by 2 h room temperature incubation. After washing, an enzyme-linked antibody was added to the wells, and the concentrations of cytokines were assessed based on standard curves.

**Reference**

1. Jiang H, Acharya C, An G, et al. SAR650984 directly induces multiple myeloma cell death via lysosomal-associated and apoptotic pathways, which is further enhanced by pomalidomide. Leukemia. 2016;30(2):399-408.

**Supplemental Figure 1 Frequencies of CD38+ cells and CD38 levels are increased in Tregs vs. Tcons and MM patients have more CD38-expressing Tregs than normal donors**

Shown are percentages of CD38+ cells in CD4+CD25hiFoxp3+ Tregs and CD4+CD25- Tcons from 1 representative PBMC sample (**A**) and summary of 8 normal donors (**B**, upper panel, means + SDs). Percentages of CD38low/- subsets are shown in **B**, lower panel. (**C**) Histograms of CD38 MFI on gated Tregs and Tcons of a representative normal donor. (**D**) Shown are percentages (means + SDs) of CD38+ (upper panel) and CD38low/- (lower panel) Tregs in 11 MM patients and 8 normal donors. (**E**) Histograms of CD38 MFI on Tregs of a MM patient vs. normal donor. (**F**) Representative plot for CFSE-labeled Tcons, alone (left panel) and cocultured with autologous Treg isolated from a MM patient (right panel), in the presence of anti-CD3/CD28 beads for 5d. Proliferation of Tcons was determined by percentages of CFSE dilution. **P< 0.01, ***P<0.005, ****P<0.001

**Supplemental Figure 2 CD38 is upregulated on Tregs of PBMCs by Len or Pom.**

Shown are representative histograms of CD38 on CD4+CD25hiFoxp3+Tregs from a MM patient (upper panel) and a normal donor (lower panel) treated with indicated drugs.

**Supplemental Figure 3 Isa preferentially inhibits Treg vs. Tcon and blocks suppression of Treg on proliferation of Tcon.**

PBMCs from normal donors (**A**, n=10) or MM patients (**B**, n=7) were pretreated with 1µM Len or Pom for 3-5 days followed by incubation with Isa, alone or with Len/Pom, for another 3 days. Flow cytometry was used to determine % of Tregs (upper panel) and Tcons (middle panel) in CD4+ lymphocytes. (**C**) PBMCs from 4 MM patients were treated with either Isa (whole IgG1) or its F(ab)’2 fragments, followed by flow cytometry analysis to determine % Treg (upper panel) and % Tcons (lower panel) in CD4+ population. Mean and SEM of 4 independent experiments are shown. (**D**) Purified Tcons were incubated with or without autologous Tregs isolated from PBMCs at 1:1 ratio for 5d in the presence of anti-CD3/CD28 dynabeads and treated with Isa followed by [3H] thymidine incorporation assay. Results are shown as fold changes by day 0. *P< 0.05, **P< 0.01, ***P< 0.001, ****P< 0.0001.

**Supplemental Figure 4 Isa inhibits expression of Foxp3 in MM patient Tregs**

Tregs were purified from PBMCs of MM patients treated with or without 1μg/ml Isa for 1d followed by real-time qRT-PCR assay for Foxp3. Shown are fold changes relative to control groups after normalization with GAPDH control.

**Supplemental Figure 5 Isa augments CD8+ T and NK-effector cell-mediated cytotoxicity against MM cells, which is further enhanced by Len/Pom**

PBMCs were pretreated with Isa, alone or with Len/Pom for 2-3 days, and then RPMI8226 MM cells were added at a E:T ratio of 10:1 for 5h, followed by flow cytometry analysis for cell membrane CD107a and intracellular IFNγ. (**A**) CD107a (upper panel) and IFNγ (lower panel) in CD3+CD8+ T cell gate (normal donors, n=5). (**B**) CD107a (upper panel) and IFNγ (lower panel) in CD3-CD56+ NK cells gate (normal donors, n=3). Shown are Means±SEMs. *P< 0.05, **P< 0.01, ***P< 0.001.

**Supplemental Figure 6 iTregs with high CD38 levels are induced in PBMC and Tcons cocultured with MM cells., associated with cytokines and cell contact in an ex vivo culture system**

(**A**) Mitomycin C-treated RPMI8226 or U266 MM cells were added to PBMCs (left) or purified Tcons (right) for 7 days. Dot plots of Tregs in CD4+ T cells after excluding CD138+MM cells from representative samples are shown. (**B**) Results (Means ± SEMs) of 5 PBMCs and 11 Tcons co-cultured with indicated MM cell lines are shown. Indicated proteins were examined on iTregs from PBMCs (**C**) or Tcons (**D**) cocultured with (closed box) or without (white box) U266 (gray box) or RPMI8226 (black box) MM cells. (**E**) All markers shown here are significantly upregulated in iTregs from Tcons following 7-d coculture with JJN3 MM cells (CD38-negative). Levels of CD127, which is very low and CD62L, not shown here, was not changed. *P< 0.05, **P< 0.01, ***P< 0.001, ****P< 0.0001

**Supplemental Figure 7** **Induction of MM cell-stimulated iTreg is associated with cytokines and cell contact**

(**A**) PD-L1 was increased on cell membrane of viable MM cells (CD138+/PI-/annexin V-) in the same cultures in Supplemental Figure 6D. (**B**) Conditioned media from MM increase frequency of Tregs. PBMCs were cultured in either conditioned media (CM) from RPMI8226 or U266 cells or control growth media (cnt) for 7d, followed by determination of % Tregs. (**C**) Cytokines in the supernatants of ex vivo co-cultures were detected by ELISA. Shown are Means±SEMs of triplicate for a representative experiment. (**D**) Three MM cell lines were added to purified Tcons for 7 days with or without a neutralizing anti-TGF β mAb. (**E**) Indicated MM cells were added to purified Tcons for 7 days with or without 10μg/ml anti-PD1 or anti-PD-L1 mAb; shown is a representative plot. *P< 0.05, **P< 0.01, ***P< 0.001, ****P< 0.0001

**
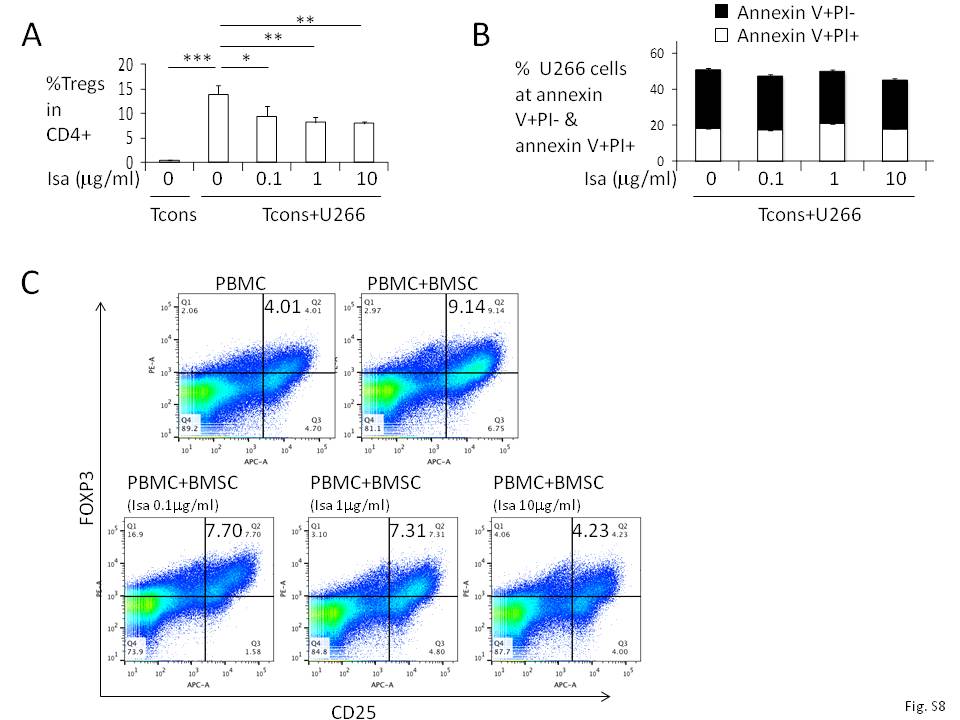
**

**Supplemental Figure 8 Isa prevents induction of iTregs by MM cells and BMSCs**

(**A**) Percentages of iTregs were determined in co-cultures of U266 (CD38-negative) with Tcons (n=3) treated with indicated doses of Isa for 7 days. Shown are Means ± SEMs. (**B**) Cocultures in (**A**) were followed by annexin V staining in gated CD138+ U266 MM cells. Isa did not further alter viability of CD38-negative U266 MM cells when cocultured with Tcons. (**C**) Adherent bone marrow stromal cells (BMSCs) derived from MM patients were co-cultured with PBMCs, with or without Isa, followed by flow cytometry analysis for Tregs. *P< 0.05, **P< 0.01, ***P< 0.001
